# Supplementary material
Source: PubMed Central journal article supplement (PMC4426629)
Supplement: rspb20150211supp1.pdf [file rspb20150211supp1.pdf]

## Supplementary tables and figures

Table S1. Number of cases available for analyses after restrictions

| Description / Restriction                         | N     |
|---------------------------------------------------|-------|
| Total sample                                      | 94516 |
| Birthyear $\geq$ 1935 & Age $\geq$ 45             | 46257 |
| Only Dutch born, plus Dutch born parents          | 43520 |
| Only singles and heterosexual couples             | 43010 |
| Only include data that is consistent <sup>a</sup> | 42657 |
| Age at first birth $\geq$ 16 or missing           | 42627 |
| Non-missing height                                | 42612 |
| Sample for use                                    | 42612 |
| When including onset of relationship              |       |
| Age at start relationship $\geq$ 14 or missing    | 42549 |
| Time till birth since start relationship $\geq$ 0 | 42116 |

<sup>a</sup> This includes: where full information on birth dates and sex of children was given, and when months of births were within appropriate digits (1-12)

Table S2. Descriptive statistics for men and women

|                                                                          | Men   |                   |           | Women |                   |           |
|--------------------------------------------------------------------------|-------|-------------------|-----------|-------|-------------------|-----------|
|                                                                          | N     | Mean $\pm$ SD / % | Min-Max   | N     | Mean $\pm$ SD / % | Min-Max   |
| Birthyear                                                                | 18032 | 1956 $\pm$ 7.93   | 1935-1967 | 24580 | 1956 $\pm$ 7.66   | 1935-1967 |
| Age (yrs)                                                                | 18032 | 54.33 $\pm$ 7.99  | 45-77     | 24580 | 53.9 $\pm$ 7.71   | 45-77     |
| Height (cm)                                                              | 18032 | 181.61 $\pm$ 6.83 | 129-210   | 24580 | 168.23 $\pm$ 6.29 | 114-196   |
| # Children born                                                          | 18032 | 2.11 $\pm$ 1.2    | 0-10      | 24580 | 2.17 $\pm$ 1.18   | 0-8       |
| # Children surviving                                                     | 18032 | 2.09 $\pm$ 1.18   | 0-10      | 24580 | 2.14 $\pm$ 1.15   | 0-8       |
| Age at first birth                                                       | 15480 | 28.88 $\pm$ 4.81  | 16-61     | 21603 | 26.3 $\pm$ 4.46   | 16-48     |
| Age at last birth                                                        | 15480 | 33.31 $\pm$ 5.04  | 18-63     | 21603 | 30.75 $\pm$ 4.55  | 16-59     |
| Ever had child                                                           | 18032 | 86%               |           | 24580 | 88%               |           |
| Ever had 2nd child                                                       | 15480 | 92%               |           | 21535 | 92%               |           |
| Currently has partner                                                    | 18032 | 91%               |           | 24580 | 85%               |           |
| # Children with partner                                                  | 18032 | 1.85 $\pm$ 1.29   | 0-6       | 24580 | 1.82 $\pm$ 1.34   | 0-6       |
| Duration relationship (years)                                            | 16314 | 27.43 $\pm$ 11.63 | 0-87      | 20855 | 28.67 $\pm$ 11.28 | 0-60      |
| Age onset relationship (yrs)                                             | 16236 | 27.16 $\pm$ 8.57  | 16-74     | 20288 | 25.19 $\pm$ 8.55  | 16-71     |
| Time until birth (yrs)                                                   | 12908 | 4.91 $\pm$ 3.91   | 0-25      | 15994 | 4.62 $\pm$ 3.77   | 0-25      |
| Ever married                                                             | 17980 | 96%               |           | 24507 | 96%               |           |
| Education                                                                | 17675 |                   |           | 23712 |                   |           |
| No education                                                             | 121   | 0.7%              |           | 168   | 0.7%              |           |
| Primary education                                                        | 497   | 2.8%              |           | 769   | 3.2%              |           |
| Lower or preparatory vocational education                                | 3844  | 21.7%             |           | 4317  | 18.2%             |           |
| Lower general secondary education                                        | 2232  | 12.6%             |           | 5215  | 22%               |           |
| Intermediate vocational education or apprenticeship                      | 4736  | 26.8%             |           | 6078  | 25.6%             |           |
| Higher general secondary education or pre-university secondary education | 1101  | 6.2%              |           | 2095  | 8.8%              |           |
| Higher vocational education                                              | 4071  | 23%               |           | 4455  | 18.8%             |           |
| University                                                               | 1073  | 6.1%              |           | 615   | 2.6%              |           |

|                         |       |       |  |       |              |       |
|-------------------------|-------|-------|--|-------|--------------|-------|
| Income                  | 14964 |       |  | 18882 |              |       |
| < €750                  | 73    | 0.5%  |  | 395   | 2.1%         |       |
| €750 - €1000            | 177   | 1.2%  |  | 797   | 4.2%         |       |
| €1000 - €1500           | 975   | 6.5%  |  | 2218  | 11.7%        |       |
| €1500 - €2000           | 2394  | 16%   |  | 3083  | 16.3%        |       |
| €2000 - €2500           | 2836  | 19%   |  | 3200  | 16.9%        |       |
| €2500 - €3000           | 2845  | 19%   |  | 3185  | 16.9%        |       |
| €3000 - €3500           | 2294  | 15.3% |  | 2603  | 13.8%        |       |
| > €3500                 | 3370  | 22.5% |  | 3401  | 18%          |       |
| Health                  | 17619 |       |  | 24063 |              |       |
| Excellent               | 1626  | 9.2%  |  | 1738  | 7.2%         |       |
| Very good               | 4532  | 25.7% |  | 5307  | 22.1%        |       |
| Good                    | 9801  | 55.6% |  | 14313 | 59.5%        |       |
| Not so good             | 1562  | 8.9%  |  | 2594  | 10.8%        |       |
| Poor                    | 98    | 0.6%  |  | 111   | 0.5%         |       |
| Age at menses (yrs)     |       |       |  | 23758 | 13.21 ± 1.49 | 8-20  |
| Age at menopause (yrs)  |       |       |  | 13931 | 47.89 ± 5.59 | 30-60 |
| Reproductive span (yrs) |       |       |  | 13814 | 34.67 ± 5.7  | 13-49 |

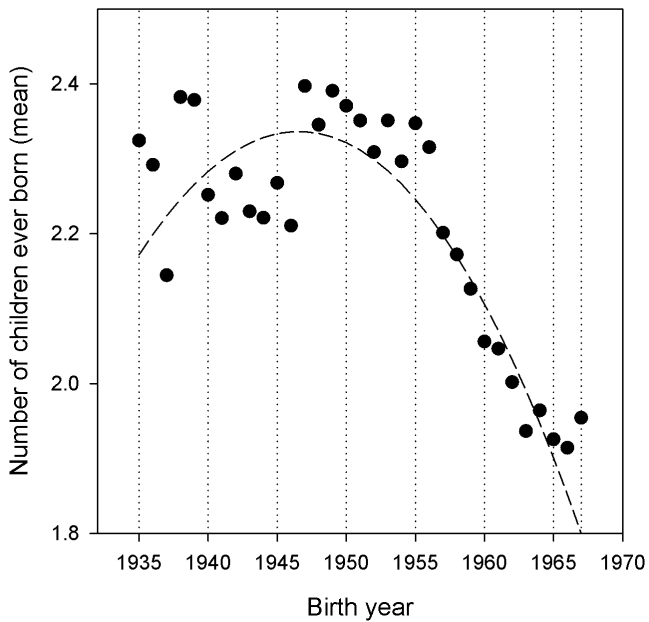

Figure S1. Mean fertility across birth years

Table S3. Five year running averages and standard deviations per birth year for males and females (average of values from given year, two preceding, and two subsequent years).

| Birthyear | Men         |      |      |                       |                  | Women       |      |      |                       |                  |
|-----------|-------------|------|------|-----------------------|------------------|-------------|------|------|-----------------------|------------------|
|           | Mean height | SD   | N    | Running average (5 y) | Running SD (5 y) | Mean height | SD   | N    | Running average (5 y) | Running SD (5 y) |
| 1933      | 175.98      | 6.28 | 68   |                       |                  | 162.53      | 6.05 | 87   |                       |                  |
| 1934      | 175.87      | 5.88 | 68   |                       |                  | 162.9       | 5.02 | 96   |                       |                  |
| 1935      | 176.82      | 6.29 | 90   | 176.43                | 6.26             | 163.4       | 5.86 | 102  | 163.15                | 5.73             |
| 1936      | 176.3       | 6.67 | 104  | 176.52                | 6.29             | 163.89      | 5.71 | 143  | 163.34                | 5.7              |
| 1937      | 177.17      | 6.18 | 131  | 176.86                | 6.37             | 163.03      | 5.99 | 178  | 163.61                | 5.79             |
| 1938      | 176.43      | 6.44 | 153  | 176.98                | 6.37             | 163.47      | 5.91 | 174  | 163.71                | 5.73             |
| 1939      | 177.59      | 6.26 | 187  | 177.02                | 6.29             | 164.23      | 5.48 | 215  | 163.96                | 5.83             |
| 1940      | 177.39      | 6.28 | 210  | 177.05                | 6.51             | 163.91      | 5.55 | 263  | 164.3                 | 5.89             |
| 1941      | 176.54      | 6.29 | 258  | 177.37                | 6.52             | 165.17      | 6.23 | 261  | 164.59                | 5.8              |
| 1942      | 177.3       | 7.29 | 266  | 177.6                 | 6.61             | 164.74      | 6.29 | 319  | 164.88                | 5.91             |
| 1943      | 178.02      | 6.45 | 339  | 177.98                | 6.69             | 164.9       | 5.47 | 353  | 165.15                | 5.95             |
| 1944      | 178.72      | 6.73 | 346  | 178.42                | 6.7              | 165.7       | 6.02 | 424  | 165.4                 | 5.88             |
| 1945      | 179.33      | 6.69 | 384  | 178.88                | 6.47             | 165.23      | 5.75 | 471  | 165.76                | 5.83             |
| 1946      | 178.71      | 6.31 | 522  | 179.15                | 6.48             | 166.4       | 5.88 | 631  | 166.01                | 5.92             |
| 1947      | 179.61      | 6.14 | 495  | 179.37                | 6.38             | 166.57      | 6.05 | 601  | 166.19                | 6.03             |
| 1948      | 179.39      | 6.52 | 517  | 179.5                 | 6.24             | 166.13      | 5.9  | 661  | 166.56                | 6.14             |
| 1949      | 179.83      | 6.26 | 510  | 179.88                | 6.18             | 166.64      | 6.58 | 589  | 166.73                | 6.15             |
| 1950      | 179.95      | 5.98 | 473  | 180.12                | 6.27             | 167.04      | 6.3  | 616  | 166.82                | 6.13             |
| 1951      | 180.62      | 6    | 410  | 180.47                | 6.33             | 167.26      | 5.93 | 659  | 167.07                | 6.09             |
| 1952      | 180.83      | 6.62 | 470  | 180.79                | 6.32             | 167.02      | 5.95 | 686  | 167.37                | 5.94             |
| 1953      | 181.11      | 6.8  | 418  | 181.15                | 6.4              | 167.41      | 5.69 | 680  | 167.49                | 5.84             |
| 1954      | 181.42      | 6.19 | 490  | 181.41                | 6.49             | 168.1       | 5.83 | 677  | 167.69                | 5.86             |
| 1955      | 181.75      | 6.4  | 483  | 181.72                | 6.49             | 167.67      | 5.8  | 716  | 168.03                | 5.86             |
| 1956      | 181.93      | 6.45 | 491  | 181.92                | 6.48             | 168.24      | 6.03 | 684  | 168.35                | 5.96             |
| 1957      | 182.38      | 6.63 | 596  | 182.18                | 6.59             | 168.73      | 5.93 | 879  | 168.58                | 6.01             |
| 1958      | 182.14      | 6.71 | 789  | 182.39                | 6.63             | 168.99      | 6.21 | 1087 | 168.86                | 6.04             |
| 1959      | 182.71      | 6.73 | 992  | 182.57                | 6.59             | 169.27      | 6.1  | 1316 | 169.11                | 6.04             |
| 1960      | 182.81      | 6.6  | 1319 | 182.73                | 6.57             | 169.04      | 5.94 | 1792 | 169.21                | 6.09             |
| 1961      | 182.83      | 6.3  | 1416 | 182.98                | 6.54             | 169.49      | 6    | 2073 | 169.33                | 6.09             |
| 1962      | 183.14      | 6.5  | 1363 | 183.14                | 6.51             | 169.23      | 6.21 | 2061 | 169.43                | 6.08             |
| 1963      | 183.41      | 6.56 | 1471 | 183.31                | 6.54             | 169.63      | 6.18 | 2010 | 169.63                | 6.12             |
| 1964      | 183.54      | 6.6  | 1369 | 183.5                 | 6.6              | 169.77      | 6.09 | 1917 | 169.78                | 6.15             |
| 1965      | 183.62      | 6.72 | 1323 | 183.66                | 6.62             | 170.03      | 6.09 | 1844 | 170.07                | 6.16             |
| 1966      | 183.79      | 6.61 | 1314 | 183.78                | 6.67             | 170.26      | 6.18 | 1831 | 170.28                | 6.15             |
| 1967      | 183.95      | 6.6  | 1260 | 183.85                | 6.66             | 170.67      | 6.27 | 1690 | 170.49                | 6.15             |
| 1968      | 184.01      | 6.81 | 1163 |                       |                  | 170.7       | 6.13 | 1773 |                       |                  |
| 1969      | 183.9       | 6.6  | 1258 |                       |                  | 170.77      | 6.09 | 1796 |                       |                  |

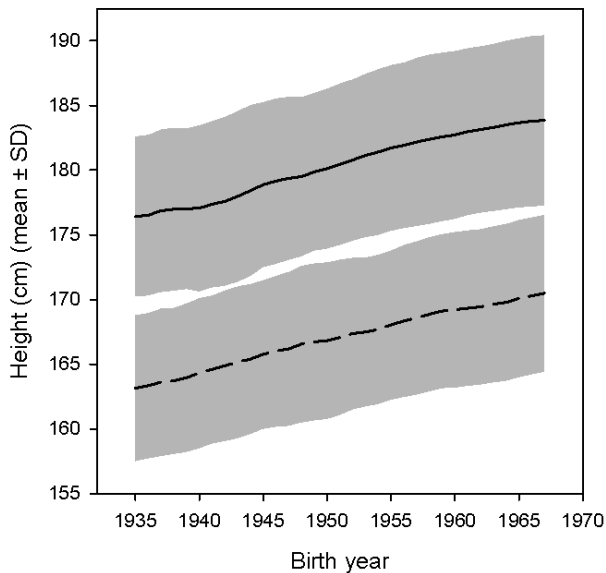

Figure S2. Running mean and SD for height per birth year (see Table S3)

For all the tables below (S4-S14), the following information holds:

\* Parameter estimates are given for the effects of birth cohort (seven categories), and height. We tested two models, one with a linear term of height and one with both the linear and the quadratic term, and we provide the parameters for the model in which all variables were significant (thus, when a quadratic term was non-significant, we only show the parameter estimates from the model with the linear term). When neither height nor height<sup>2</sup> is significant, we present the model with both variables.

\* The ‘interaction’ in the table refers to an interaction between height and the factor birth cohort, which tests whether the effect of height on the dependent variable is different for the different cohorts. The significance test is a deviance test (*Chi-Square* with 6 degrees of freedom) when the dependent variable has a binary or Poisson distribution, and a partial *F*-test (*F*-test with 6 and *N* minus 7 degrees of freedom) when the dependent variable is normally distributed.

\* When a significant quadratic effect was observed (either when the linear term was or was not significant), we obtained a 95% confidence interval for the optimum by simulating the model including the linear and quadratic term 1000 times (using the “simulate()” function in R), and determined the optimum for each of these instances.

\* Effect size refers to our own calculated measure of effect size, which we obtained by estimating the smallest (minimum) and largest (maximum) predicted value (based on the parameter estimates in Tables S4-S12; all predicted values are based on birth cohort 1950-54) within -2 and +2 standard deviations of the height range. We expressed the difference ratio between this maximum and minimum (maximum/minimum) in percentages.

Table S4. Poisson regression parameter estimates (B ± SE (p)) for the effect of birth cohort and male height on several dependent variables

|                             | # Children ever born           | # Surviving children           | # Children after firstborn     | # Children with current partner | # Children with current partner |
|-----------------------------|--------------------------------|--------------------------------|--------------------------------|---------------------------------|---------------------------------|
| Cohort=1935 (Intercept)     | 0.837 ± 0.026<br>( $<.0001$ )  | 0.821 ± 0.026<br>( $<.0001$ )  | 1.054 ± 0.026<br>( $<.0001$ )  | 0.728 ± 0.028<br>( $<.0001$ )   | 2.204 ± 0.036<br>( $<.0001$ )   |
| Cohort=1940                 | -0.027 ± 0.032<br>(0.3878)     | -0.025 ± 0.032<br>(0.437)      | -0.099 ± 0.032<br>(0.0017)     | -0.044 ± 0.033<br>(0.1917)      | -0.117 ± 0.034<br>(0.0005)      |
| Cohort=1945                 | 0.02 ± 0.029<br>(0.4929)       | 0.024 ± 0.029<br>(0.4236)      | -0.136 ± 0.029<br>( $<.0001$ ) | 0.009 ± 0.031<br>(0.7709)       | -0.12 ± 0.031<br>(0.0001)       |
| Cohort=1950                 | 0.02 ± 0.029<br>(0.4923)       | 0.026 ± 0.03<br>(0.3862)       | -0.125 ± 0.029<br>( $<.0001$ ) | -0.009 ± 0.031<br>(0.7613)      | -0.141 ± 0.032<br>( $<.0001$ )  |
| Cohort=1955                 | -0.043 ± 0.028<br>(0.1311)     | -0.037 ± 0.029<br>(0.195)      | -0.13 ± 0.028<br>( $<.0001$ )  | -0.077 ± 0.03<br>(0.011)        | -0.158 ± 0.031<br>( $<.0001$ )  |
| Cohort=1960                 | -0.164 ± 0.027<br>( $<.0001$ ) | -0.159 ± 0.028<br>( $<.0001$ ) | -0.193 ± 0.027<br>( $<.0001$ ) | -0.199 ± 0.029<br>( $<.0001$ )  | -0.245 ± 0.029<br>( $<.0001$ )  |
| Cohort=1965                 | -0.201 ± 0.031<br>( $<.0001$ ) | -0.199 ± 0.032<br>( $<.0001$ ) | -0.217 ± 0.031<br>( $<.0001$ ) | -0.219 ± 0.033<br>( $<.0001$ )  | -0.29 ± 0.034<br>( $<.0001$ )   |
| ZHeight                     | 0.024 ± 0.005<br>( $<.0001$ )  | 0.025 ± 0.005<br>( $<.0001$ )  | 0.006 ± 0.005<br>(0.2633)      | 0.022 ± 0.006<br>( $<.0001$ )   | 0.018 ± 0.006<br>(0.0016)       |
| Zheight <sup>2</sup>        | -0.012 ± 0.003<br>(0.0005)     | -0.013 ± 0.003<br>(0.0003)     | -0.003 ± 0.003<br>(0.3962)     | -0.011 ± 0.004<br>(0.0021)      |                                 |
| Age in relationship         |                                |                                |                                |                                 | -0.052 ± 0.001<br>( $<.0001$ )  |
| N                           | 18032                          | 18032                          | 15480                          | 18032                           | 16236                           |
| Interaction                 | 7.386 (0.287)                  | 8.349 (0.214)                  | 3.227 (0.78)                   | 6.605 (0.359)                   | 4.133 (0.659)                   |
| Optimum (CI <sub>95</sub> ) | 1.016<br>(0.504, 2.242)        | 0.996<br>(0.506, 2.146)        |                                | 0.991<br>(0.481, 2.531)         |                                 |
| Effect size                 | 11.6% (2.14-2.39)              | 12% (2.11-2.36)                | 2.7% (2.47-2.54)               | 10.7% (1.87-2.07)               | 7.4% (2.05-2.2) <sup>a</sup>    |

<sup>a</sup>This 'effect size' was established for the median age in the relationship (22 for women, 25 for men).

Table S5. Logistic regression parameter estimates (B ± SE (p)) for the effect of birth cohort and male height on several dependent variables

|                         | Ever had partner               | Currently has partner         | Ever had child                | Ever had 2 <sup>nd</sup> child | Proportion surviving children | Ever had child deceased       |
|-------------------------|--------------------------------|-------------------------------|-------------------------------|--------------------------------|-------------------------------|-------------------------------|
| Cohort=1935 (Intercept) | 5.445 ± 0.578<br>( $<.0001$ )  | 2.063 ± 0.123<br>( $<.0001$ ) | 1.426 ± 0.099<br>( $<.0001$ ) | 3.12 ± 0.218<br>( $<.0001$ )   | 4.154 ± 0.208<br>( $<.0001$ ) | -3.148 ± 0.22<br>( $<.0001$ ) |
| Cohort=1940             | -1.026 ± 0.625<br>(0.1007)     | 0.384 ± 0.156<br>(0.014)      | 0.422 ± 0.124<br>(0.0007)     | -0.067 ± 0.259<br>(0.7942)     | 0.169 ± 0.258<br>(0.5115)     | -0.214 ± 0.27<br>(0.4279)     |
| Cohort=1945             | -0.831 ± 0.612<br>(0.1743)     | 1.002 ± 0.156<br>( $<.0001$ ) | 1.255 ± 0.127<br>( $<.0001$ ) | -0.409 ± 0.235<br>(0.0814)     | 0.248 ± 0.238<br>(0.2986)     | -0.335 ± 0.25<br>(0.1803)     |
| Cohort=1950             | -1.308 ± 0.601<br>(0.0296)     | 0.896 ± 0.156<br>( $<.0001$ ) | 1.109 ± 0.126<br>( $<.0001$ ) | -0.443 ± 0.236<br>(0.0601)     | 0.415 ± 0.246<br>(0.0925)     | -0.524 ± 0.259<br>(0.0432)    |
| Cohort=1955             | -2.285 ± 0.584<br>( $<.0001$ ) | -0.001 ± 0.134<br>(0.9965)    | 0.539 ± 0.111<br>( $<.0001$ ) | -0.592 ± 0.229<br>(0.0099)     | 0.449 ± 0.237<br>(0.0576)     | -0.547 ± 0.249<br>(0.0278)    |
| Cohort=1960             | -2.656 ± 0.58<br>( $<.0001$ )  | 0.036 ± 0.128<br>(0.779)      | 0.153 ± 0.103<br>(0.1373)     | -1.024 ± 0.222<br>( $<.0001$ ) | 0.353 ± 0.223<br>(0.1129)     | -0.573 ± 0.236<br>(0.015)     |
| Cohort=1965             | -2.635 ± 0.587<br>( $<.0001$ ) | 0.371 ± 0.151<br>(0.0137)     | 0.083 ± 0.116<br>(0.4727)     | -1.165 ± 0.233<br>( $<.0001$ ) | 0.121 ± 0.255<br>(0.6361)     | -0.284 ± 0.266<br>(0.2864)    |
| ZHeight                 | 0.131 ± 0.037<br>(0.0004)      | 0.108 ± 0.025<br>( $<.0001$ ) | 0.12 ± 0.021<br>( $<.0001$ )  | 0.111 ± 0.029<br>(0.0002)      | 0.054 ± 0.046<br>(0.2367)     | -0.064 ± 0.048<br>(0.1861)    |
| ZHeight <sup>2</sup>    | -0.055 ± 0.017<br>(0.0014)     | -0.03 ± 0.014<br>(0.0285)     | -0.047 ± 0.013<br>(0.0002)    |                                | -0.038 ± 0.024<br>(0.1125)    | 0.026 ± 0.027<br>(0.3499)     |

|                             |                         |                          |                         |                     |                     |                                  |
|-----------------------------|-------------------------|--------------------------|-------------------------|---------------------|---------------------|----------------------------------|
| N                           | 17980                   | 18032                    | 18032                   | 15480               | 15480               | 15480                            |
| Interaction                 | 13.036 (0.042)          | 13.802 (0.032)           | 12.416 (0.053)          | 9.529 (0.146)       | 4.311 (0.635)       | 4.659 (0.588)                    |
| Optimum (CI <sub>95</sub> ) | 1.188<br>(0.423, 3.934) | 1.808<br>(0.381, 10.951) | 1.265<br>(0.688, 2.803) |                     |                     |                                  |
| Effect size                 | 1.1%<br>(0.97-0.99)     | 2.4%<br>(0.93-0.96)      | 4.5%<br>(0.89-0.93)     | 2.9%<br>(0.92-0.95) | 0.3%<br>(0.99-0.99) | 0.7%<br>(0.98-0.97) <sup>a</sup> |

<sup>a</sup> To determine the effect size, we calculated the probability of never having a child deceased, for consistency with “Proportion of surviving children”

Table S6. Linear regression parameter estimates (B ± SE (p)) for the effect of birth cohort and male height on several dependent variables

|                             | Age in relationship            | Age in relationship <sup>a</sup> | Age first birth                | Time until birth child           | Time until birth child <sup>a</sup> | Age last birth <sup>c</sup>    |
|-----------------------------|--------------------------------|----------------------------------|--------------------------------|----------------------------------|-------------------------------------|--------------------------------|
| Cohort=1935 (Intercept)     | 28.269 ± 0.36<br>( $<.0001$ )  | 25.142 ± 0.253<br>( $<.0001$ )   | 27.229 ± 0.201<br>( $<.0001$ ) | 9.218 ± 0.219<br>( $<.0001$ )    | 10.714 ± 0.235<br>( $<.0001$ )      | 32.856 ± 0.216<br>( $<.0001$ ) |
| Cohort=1940                 | -0.91 ± 0.431<br>(0.0345)      | -0.885 ± 0.302<br>(0.0034)       | -0.769 ± 0.238<br>(0.0013)     | -0.272 ± 0.19<br>(0.152)         | -0.394 ± 0.19<br>(0.038)            | -1.356 ± 0.257<br>( $<.0001$ ) |
| Cohort=1945                 | -1.458 ± 0.4<br>(0.0003)       | -1.256 ± 0.279<br>( $<.0001$ )   | -0.646 ± 0.221<br>(0.0035)     | 0.169 ± 0.177<br>(0.338)         | 0.077 ± 0.176<br>(0.662)            | -1.284 ± 0.238<br>( $<.0001$ ) |
| Cohort=1950                 | -1.471 ± 0.404<br>(0.0003)     | -1.462 ± 0.282<br>( $<.0001$ )   | 0.261 ± 0.223<br>(0.2408)      | 1.429 ± 0.178<br>( $<.0001$ )    | 1.221 ± 0.179<br>( $<.0001$ )       | -0.519 ± 0.241<br>(0.0309)     |
| Cohort=1955                 | -1.188 ± 0.392<br>(0.0024)     | -0.617 ± 0.274<br>(0.0243)       | 2.081 ± 0.216<br>( $<.0001$ )  | 2.835 ± 0.174<br>( $<.0001$ )    | 2.774 ± 0.174<br>( $<.0001$ )       | 1.057 ± 0.234<br>( $<.0001$ )  |
| Cohort=1960                 | -1.14 ± 0.375<br>(0.0024)      | -0.256 ± 0.263<br>(0.3305)       | 3.025 ± 0.208<br>( $<.0001$ )  | 3.741 ± 0.167<br>( $<.0001$ )    | 3.751 ± 0.167<br>( $<.0001$ )       | 1.419 ± 0.225<br>( $<.0001$ )  |
| Cohort=1965                 | -1.644 ± 0.419<br>( $<.0001$ ) | -0.279 ± 0.291<br>(0.3376)       | 3.397 ± 0.234<br>( $<.0001$ )  | 4.091 ± 0.186<br>( $<.0001$ )    | 4.143 ± 0.187<br>( $<.0001$ )       | 1.608 ± 0.255<br>( $<.0001$ )  |
| ZHeight                     | 0.13 ± 0.068<br>(0.055)        | -0.024 ± 0.046<br>(0.6048)       | 0.076 ± 0.037<br>(0.0396)      | 0.025 ± 0.03<br>(0.400)          | 0.02 ± 0.03<br>(0.502)              | 0.059 ± 0.041<br>(0.1457)      |
| ZHeight <sup>2</sup>        | 0.111 ± 0.043<br>(0.0103)      | -0.354 ± 0.007<br>( $<.0001$ )   | 0.049 ± 0.025<br>(0.0449)      | -0.026 ± 0.02<br>(0.190)         | -0.354 ± 0.007<br>( $<.0001$ )      | 0.036 ± 0.027<br>(0.1811)      |
| Age in relationship         |                                |                                  |                                | -0.27 ± 0.006<br>( $<.0001$ )    | -0.334 ± 0.007<br>( $<.0001$ )      |                                |
| N                           | 16236                          | 13669                            | 15480                          | 12908                            | 12292                               | 14173                          |
| Interaction                 | 1.374 (0.221)                  | 1.353 (0.23)                     | 0.662 (0.681)                  | 0.369 (0.899)                    | 0.28 (0.947)                        | 3.047 (0.006)                  |
| Optimum (CI <sub>95</sub> ) | -0.582<br>(-2.202, -0.0001)    | 0.075<br>(-0.198, 0.391)         | -0.771<br>(-4.685, 0.175)      |                                  |                                     |                                |
| Effect size                 | 2.8%<br>(26.76-27.5)           | 2.9%<br>(23.68-24.36)            | 1.4%<br>(27.46-27.84)          | 4.2%<br>(3.74-3.90) <sup>b</sup> | 3%<br>(3.49-3.60) <sup>b</sup>      | 0.9%<br>(32.31-32.60)          |

<sup>a</sup> Sample excluded individuals that were divorced, widowed, or had children with previous partners

<sup>b</sup> This ‘effect size’ was established for the median age in the relationship (22 for women, 25 for men).

<sup>c</sup> Sample only included individuals that had more than one child.

Table S7. Poisson regression parameter estimates (B ± SE (p)) for the effect of birth cohort and male height on the number of children ever born and potential mediation effects of relationship status

|                                    | # Children ever born <sup>a</sup> | # Children ever born <sup>a</sup> | # Children ever born <sup>b</sup> | # Children ever born <sup>b</sup> |
|------------------------------------|-----------------------------------|-----------------------------------|-----------------------------------|-----------------------------------|
| Cohort=1935 (Intercept)            | 0.837 ± 0.026 (<.0001)            | -1.099 ± 0.073 (<.0001)           | 0.837 ± 0.026 (<.0001)            | 0.267 ± 0.034 (<.0001)            |
| Cohort=1940                        | -0.027 ± 0.032 (0.3994)           | -0.02 ± 0.032 (0.5335)            | -0.027 ± 0.032 (0.3878)           | -0.043 ± 0.032 (0.1676)           |
| Cohort=1945                        | 0.021 ± 0.029 (0.4787)            | 0.026 ± 0.029 (0.3795)            | 0.02 ± 0.029 (0.4929)             | -0.014 ± 0.029 (0.6414)           |
| Cohort=1950                        | 0.021 ± 0.029 (0.4717)            | 0.032 ± 0.029 (0.2813)            | 0.02 ± 0.029 (0.4923)             | -0.011 ± 0.029 (0.7076)           |
| Cohort=1955                        | -0.042 ± 0.028 (0.1425)           | -0.008 ± 0.028 (0.7842)           | -0.043 ± 0.028 (0.1311)           | -0.043 ± 0.028 (0.1347)           |
| Cohort=1960                        | -0.162 ± 0.027 (<.0001)           | -0.112 ± 0.027 (<.0001)           | -0.164 ± 0.027 (<.0001)           | -0.166 ± 0.027 (<.0001)           |
| Cohort=1965                        | -0.2 ± 0.031 (<.0001)             | -0.152 ± 0.031 (<.0001)           | -0.201 ± 0.031 (<.0001)           | -0.217 ± 0.031 (<.0001)           |
| ZHeight                            | 0.024 ± 0.005 (<.0001)            | 0.019 ± 0.005 (0.0003)            | 0.024 ± 0.005 (<.0001)            | 0.02 ± 0.005 (0.0001)             |
| ZHeight <sup>2</sup>               | -0.012 ± 0.003 (0.0006)           | -0.008 ± 0.003 (0.0161)           | -0.012 ± 0.003 (0.0005)           | -0.01 ± 0.003 (0.0032)            |
| Ever had partner <sup>c</sup>      |                                   | 1.936 ± 0.068 (<.0001)            |                                   |                                   |
| Currently has partner <sup>d</sup> |                                   |                                   |                                   | 0.623 ± 0.023 (<.0001)            |
| N                                  | 17980                             | 17980                             | 18032                             | 18032                             |
| Interaction                        | 7.215 (0.301)                     | 7.292 (0.295)                     | 7.386 (0.287)                     | 4.841 (0.564)                     |
| Optimum (CI <sub>95</sub> )        | 1.000 (0.483, 2.247)              | 1.118 (0.440, 5.21)               | 1.016 (0.523, 2.392)              | 0.974 (0.395, 2.671)              |
| Effect size                        | 11.3% (2.14-2.39)                 | 8.5% (2.22-2.41)                  | 11.6% (2.14-2.39)                 | 9.4% (2.22-2.43)                  |

<sup>a</sup> Sample included only men who had no missing values on the variable “Ever had a partner”

<sup>b</sup> Sample included only men who had no missing values on the variable “Currently does not have partner”

<sup>c</sup> Reference category “Never had partner”

<sup>d</sup> Reference category “Currently does not have partner”

Table S8. Poisson regression parameter estimates (B ± SE (p)) for the effect of birth cohort and female height on several dependent variables

|                             | # Children ever born    | # Surviving children    | # Children after firstborn | # Children with current partner | # Children with current partner |
|-----------------------------|-------------------------|-------------------------|----------------------------|---------------------------------|---------------------------------|
| Cohort=1935 (Intercept)     | 0.853 ± 0.023 (<.0001)  | 0.839 ± 0.024 (<.0001)  | 1.104 ± 0.023 (<.0001)     | 0.711 ± 0.025 (<.0001)          | 2.435 ± 0.036 (<.0001)          |
| Cohort=1940                 | -0.033 ± 0.029 (0.2528) | -0.034 ± 0.029 (0.2337) | -0.116 ± 0.029 (<.0001)    | -0.041 ± 0.031 (0.18)           | -0.122 ± 0.035 (0.0005)         |
| Cohort=1945                 | -0.004 ± 0.026 (0.8651) | -0.007 ± 0.026 (0.7955) | -0.181 ± 0.026 (<.0001)    | -0.027 ± 0.028 (0.337)          | -0.192 ± 0.032 (<.0001)         |
| Cohort=1950                 | 0.003 ± 0.026 (0.8982)  | 0.006 ± 0.026 (0.8116)  | -0.178 ± 0.026 (<.0001)    | -0.024 ± 0.028 (0.3968)         | -0.211 ± 0.031 (<.0001)         |
| Cohort=1955                 | -0.044 ± 0.025 (0.0801) | -0.042 ± 0.025 (0.099)  | -0.179 ± 0.025 (<.0001)    | -0.072 ± 0.027 (0.0081)         | -0.227 ± 0.031 (<.0001)         |
| Cohort=1960                 | -0.129 ± 0.024 (<.0001) | -0.126 ± 0.025 (<.0001) | -0.232 ± 0.024 (<.0001)    | -0.178 ± 0.026 (<.0001)         | -0.307 ± 0.03 (<.0001)          |
| Cohort=1965                 | -0.17 ± 0.028 (<.0001)  | -0.166 ± 0.028 (<.0001) | -0.272 ± 0.028 (<.0001)    | -0.194 ± 0.03 (<.0001)          | -0.338 ± 0.033 (<.0001)         |
| ZHeight                     | -0.001 ± 0.004 (0.7983) | 0.001 ± 0.004 (0.8138)  | 0.002 ± 0.004 (0.658)      | 0.004 ± 0.005 (0.366)           | 0.016 ± 0.005 (0.0014)          |
| ZHeight <sup>2</sup>        | -0.007 ± 0.003 (0.0159) | -0.009 ± 0.003 (0.0022) | -0.002 ± 0.003 (0.544)     | -0.007 ± 0.003 (0.0334)         |                                 |
| Age in relationship         |                         |                         |                            |                                 | -0.064 ± 0.001 (<.0001)         |
| N                           | 24580                   | 24580                   | 21535                      | 24580                           | 20288                           |
| Interaction                 | 4.793 (0.571)           | 5.21 (0.517)            | 1.854 (0.933)              | 4.885 (0.559)                   | 3.366 (0.762)                   |
| Optimum (CI <sub>95</sub> ) | -0.081 (-1.163, 0.768)  | 0.058 (-0.493, 0.601)   |                            | 0.324 (-0.564, 2.365)           |                                 |
| Effect size                 | 3.0% (2.29-2.35)        | 3.8% (2.24-2.33)        | 1.1% (2.5-2.53)            | 3.6% (1.92-1.99)                | 6.7% (2.19-2.33) <sup>a</sup>   |

<sup>a</sup> This ‘effect size’ was established for the median age in the relationship (22 for women, 25 for men).

Table S9. Logistic regression parameter estimates (B ± SE (p)) for the effect of birth cohort and female height on several dependent variables

|                             | <b>Ever had partner</b> | <b>Currently has partner</b> | <b>Ever had child</b>   | <b>Ever had 2<sup>nd</sup> child</b> | <b>Proportion surviving children</b> | <b>Ever had child deceased</b> |
|-----------------------------|-------------------------|------------------------------|-------------------------|--------------------------------------|--------------------------------------|--------------------------------|
| Cohort=1935 (Intercept)     | 3.826 ± 0.239 (<.0001)  | 0.652 ± 0.075 (<.0001)       | 1.266 ± 0.085 (<.0001)  | 3.469 ± 0.233 (<.0001)               | 4.178 ± 0.187 (<.0001)               | -3.205 ± 0.205 (<.0001)        |
| Cohort=1940                 | -0.134 ± 0.286 (0.6393) | 0.361 ± 0.093 (0.0001)       | 0.434 ± 0.109 (<.0001)  | -0.296 ± 0.271 (0.2737)              | -0.094 ± 0.227 (0.679)               | 0.065 ± 0.244 (0.7894)         |
| Cohort=1945                 | -0.082 ± 0.267 (0.7598) | 1.042 ± 0.09 (<.0001)        | 1.265 ± 0.11 (<.0001)   | -0.658 ± 0.247 (0.0078)              | -0.126 ± 0.209 (0.5468)              | 0.024 ± 0.226 (0.9155)         |
| Cohort=1950                 | -0.395 ± 0.258 (0.1254) | 1.326 ± 0.091 (<.0001)       | 1.317 ± 0.108 (<.0001)  | -0.867 ± 0.244 (0.0004)              | 0.216 ± 0.213 (0.3109)               | -0.301 ± 0.23 (0.1908)         |
| Cohort=1955                 | -0.571 ± 0.25 (0.0226)  | 1.14 ± 0.085 (<.0001)        | 0.816 ± 0.097 (<.0001)  | -1.027 ± 0.24 (<.0001)               | 0.159 ± 0.206 (0.4412)               | -0.283 ± 0.223 (0.2051)        |
| Cohort=1960                 | -0.797 ± 0.243 (0.0011) | 1.348 ± 0.081 (<.0001)       | 0.566 ± 0.09 (<.0001)   | -1.254 ± 0.236 (<.0001)              | 0.213 ± 0.198 (0.2818)               | -0.382 ± 0.215 (0.0763)        |
| Cohort=1965                 | -0.804 ± 0.257 (0.0018) | 1.533 ± 0.101 (<.0001)       | 0.563 ± 0.104 (<.0001)  | -1.405 ± 0.244 (<.0001)              | 0.324 ± 0.234 (0.1655)               | -0.505 ± 0.251 (0.0438)        |
| ZHeight                     | -0.08 ± 0.031 (0.009)   | -0.024 ± 0.018 (0.1756)      | -0.027 ± 0.019 (0.1579) | 0.002 ± 0.024 (0.9343)               | 0.12 ± 0.037 (0.0011)                | -0.1 ± 0.038 (0.0089)          |
| Zheight <sup>2</sup>        | -0.052 ± 0.014 (0.0002) | -0.034 ± 0.01 (0.0008)       | -0.034 ± 0.011 (0.0012) | -0.02 ± 0.013 (0.1183)               | -0.033 ± 0.01 (0.0014)               | 0.038 ± 0.016 (0.0155)         |
| N                           | 24507                   | 24580                        | 24580                   | 21535                                | 21535                                | 21535                          |
| Interaction                 | 9.754 (0.135)           | 9.784 (0.134)                | 5.632 (0.466)           | 3.69 (0.719)                         | 3.403 (0.757)                        | 2.772 (0.837)                  |
| Optimum (CI <sub>95</sub> ) | -0.772 (-2.419, -0.204) | -0.354 (-1.297, 0.153)       | -0.388 (-1.420, 0.194)  |                                      | 1.811 (0.421, 6.692)                 | 1.307 (0.077, 9.689)           |
| Effect size                 | 1.1% (0.97-0.98)        | 2.5% (0.86-0.88)             | 1.5% (0.92-0.93)        | 0.6% (0.93-0.93)                     | 0.7% (0.98-0.99)                     | 1.4% (0.97-0.96) <sup>a</sup>  |

<sup>a</sup> To determine the effect size, we calculated the probability of never having a child deceased, for consistency with “Proportion of surviving children”

Table S10. Linear regression parameter estimates (B ± SE (p)) for the effect of birth cohort and female height on several dependent variables

|                         | <b>Age in relationship</b> | <b>Age in relationship<sup>a</sup></b> | <b>Age first birth</b>  | <b>Time until birth child</b> | <b>Time until birth child<sup>a</sup></b> | <b>Age last birth<sup>c</sup></b> |
|-------------------------|----------------------------|----------------------------------------|-------------------------|-------------------------------|-------------------------------------------|-----------------------------------|
| Cohort=1935 (Intercept) | 26.049 ± 0.381 (<.0001)    | 23.388 ± 0.243 (<.0001)                | 24.912 ± 0.17 (<.0001)  | 9.491 ± 0.216 (<.0001)        | 10.113 ± 0.228 (<.0001)                   | 30.93 ± 0.174 (<.0001)            |
| Cohort=1940             | -0.618 ± 0.456 (0.175)     | -0.408 ± 0.29 (0.1592)                 | -0.517 ± 0.204 (0.0111) | -0.053 ± 0.192 (0.784)        | -0.067 ± 0.194 (0.729)                    | -1.545 ± 0.209 (<.0001)           |
| Cohort=1945             | -1.146 ± 0.417 (0.0061)    | -1.312 ± 0.265 (<.0001)                | -0.725 ± 0.187 (0.0001) | 0.134 ± 0.175 (0.443)         | 0.092 ± 0.177 (0.606)                     | -2.04 ± 0.192 (<.0001)            |
| Cohort=1950             | -1.463 ± 0.412 (0.0004)    | -1.613 ± 0.262 (<.0001)                | -0.255 ± 0.185 (0.1687) | 0.958 ± 0.173 (<.0001)        | 0.897 ± 0.175 (<.0001)                    | -1.375 ± 0.191 (<.0001)           |
| Cohort=1955             | -0.996 ± 0.404 (0.0136)    | -1.243 ± 0.257 (<.0001)                | 1.349 ± 0.181 (<.0001)  | 2.4 ± 0.17 (<.0001)           | 2.34 ± 0.172 (<.0001)                     | -0.24 ± 0.186 (0.1974)            |
| Cohort=1960             | -0.716 ± 0.391 (0.0674)    | -0.794 ± 0.249 (0.0015)                | 2.653 ± 0.175 (<.0001)  | 3.614 ± 0.165 (<.0001)        | 3.609 ± 0.167 (<.0001)                    | 0.718 ± 0.18 (<.0001)             |
| Cohort=1965             | -0.974 ± 0.425 (0.022)     | -0.645 ± 0.27 (0.017)                  | 3.469 ± 0.194 (<.0001)  | 4.319 ± 0.18 (<.0001)         | 4.341 ± 0.182 (<.0001)                    | 1.191 ± 0.201 (<.0001)            |



|                             |                           |                               |                               |                                |                                |                              |
|-----------------------------|---------------------------|-------------------------------|-------------------------------|--------------------------------|--------------------------------|------------------------------|
| ZHeight                     | 0.1 ± 0.06<br>(0.0979)    | 0.217 ± 0.038<br>( $<.0001$ ) | 0.289 ± 0.029<br>( $<.0001$ ) | 0.128 ± 0.026<br>( $<.0001$ )  | 0.131 ± 0.026<br>( $<.0001$ )  | 0.243 ± 0.03<br>( $<.0001$ ) |
| ZHeight <sup>2</sup>        | 0.066 ± 0.037<br>(0.0781) | 0.093 ± 0.024<br>(0.0001)     | 0.042 ± 0.018<br>(0.0194)     |                                |                                | 0.045 ± 0.019<br>(0.0163)    |
| Age in relationship         |                           |                               |                               | -0.325 ± 0.006<br>( $<.0001$ ) | -0.354 ± 0.007<br>( $<.0001$ ) |                              |
| N                           | 20288                     | 16894                         | 21535                         | 15994                          | 15370                          | 19750                        |
| Interaction                 | 0.539 (0.779)             | 0.381 (0.892)                 | 1.731 (0.109)                 | 0.993 (0.428)                  | 0.849 (0.532)                  | 0.887 (0.504)                |
| Optimum (CI <sub>95</sub> ) | -0.759<br>(-5.692, 2.399) | -1.161<br>(-2.372, -0.653)    | -3.452<br>(-14.495, -1.730)   |                                |                                | -2.705<br>(-10.120, -1.351)  |
| Effect size                 | 2.0%<br>(24.55-25.05)     | 4.3%<br>(21.65-22.58)         | 4.8%<br>(24.25-25.4)          | 16.9%<br>(3.04-3.55)           | 17.7%<br>(2.97-3.49)           | 3.3%<br>(29.25-30.22)        |

<sup>a</sup> Sample excluded individuals that were divorced, widowed, or had children with previous partners

<sup>b</sup> This ‘effect size’ was established for the median age in the relationship (22 for women, 25 for men).

<sup>c</sup> Sample only included individuals that had more than one child.

Table S11. Poisson regression parameter estimates (B ± SE (p)) for the effect of birth cohort and female height on the number of children ever born and potential mediation effects of relationship status

|                                    | # Children ever born <sup>a</sup> | # Children ever born <sup>a</sup> | # Children ever born <sup>b</sup> | # Children ever born <sup>b</sup> |
|------------------------------------|-----------------------------------|-----------------------------------|-----------------------------------|-----------------------------------|
| Cohort=1935 (Intercept)            | 0.853 ± 0.023 ( $<.0001$ )        | -0.343 ± 0.046 ( $<.0001$ )       | 0.853 ± 0.023 ( $<.0001$ )        | 0.655 ± 0.025 ( $<.0001$ )        |
| Cohort=1940                        | -0.031 ± 0.029 (0.2782)           | -0.029 ± 0.029 (0.315)            | -0.033 ± 0.029 (0.2528)           | -0.054 ± 0.029 (0.0602)           |
| Cohort=1945                        | -0.005 ± 0.026 (0.8603)           | -0.003 ± 0.026 (0.905)            | -0.004 ± 0.026 (0.8651)           | -0.055 ± 0.026 (0.0351)           |
| Cohort=1950                        | 0.003 ± 0.026 (0.9059)            | 0.011 ± 0.026 (0.679)             | 0.003 ± 0.026 (0.8982)            | -0.057 ± 0.026 (0.0293)           |
| Cohort=1955                        | -0.044 ± 0.025 (0.0843)           | -0.032 ± 0.025 (0.211)            | -0.044 ± 0.025 (0.0801)           | -0.099 ± 0.025 (0.0001)           |
| Cohort=1960                        | -0.128 ± 0.024 ( $<.0001$ )       | -0.109 ± 0.024 ( $<.0001$ )       | -0.129 ± 0.024 ( $<.0001$ )       | -0.19 ± 0.024 ( $<.0001$ )        |
| Cohort=1965                        | -0.17 ± 0.028 ( $<.0001$ )        | -0.151 ± 0.028 ( $<.0001$ )       | -0.17 ± 0.028 ( $<.0001$ )        | -0.235 ± 0.028 ( $<.0001$ )       |
| Zheight                            | -0.001 ± 0.004 (0.7595)           | 0.001 ± 0.004 (0.835)             | -0.001 ± 0.004 (0.7983)           | 0 ± 0.004 (0.9263)                |
| Zheight <sup>2</sup>               | -0.007 ± 0.003 (0.0213)           | -0.004 ± 0.003 (0.125)            | -0.007 ± 0.003 (0.0159)           | -0.006 ± 0.003 (0.0513)           |
| Ever had partner <sup>c</sup>      |                                   | 1.209 ± 0.04 ( $<.0001$ )         |                                   |                                   |
| Currently has partner <sup>d</sup> |                                   |                                   |                                   | 0.289 ± 0.014 ( $<.0001$ )        |
| N                                  | 24507                             | 24507                             | 24580                             | 24580                             |
| Interaction                        | 4.89 (0.558)                      | 3.724 (0.714)                     | 4.793 (0.571)                     | 3.724 (0.714)                     |
| Optimum (CI <sub>95</sub> )        | -0.102 (-1.250, 0.939)            | 0.104 (-2.507, 2.638)             | -0.081 (-1.012, 0.818)            | -0.037 (-1.903, 1.376)            |
| Effect size                        | 3.0% (2.29-2.35)                  | 1.9% (2.36-2.40)                  | 3% (2.29-2.35)                    | 2.3% (2.37-2.43)                  |

<sup>a</sup> Sample included only women who had no missing values on the variable “Ever had a partner”

<sup>b</sup> Sample included only women who had no missing values on the variable “Currently does not have partner”

<sup>c</sup> Reference category “Never had partner”

<sup>d</sup> Reference category “Currently does not have partner”

Table S12. Linear regression parameter estimates (B ± SE (p)) for the effect of birth cohort and female height on age at menses, age at menopause, and reproductive span

|                             | Age at menses <sup>a</sup> | Age at menopause <sup>b</sup> | Reproductive span <sup>c</sup> |
|-----------------------------|----------------------------|-------------------------------|--------------------------------|
| Cohort=1935 (Intercept)     | 13.448 ± 0.059 (<.0001)    | 48.685 ± 0.208 (<.0001)       | 35.213 ± 0.218 (<.0001)        |
| Cohort=1940                 | -0.088 ± 0.071 (0.219)     | 0.31 ± 0.25 (0.2163)          | 0.427 ± 0.259 (0.099)          |
| Cohort=1945                 | -0.099 ± 0.066 (0.133)     | 0.677 ± 0.23 (0.0033)         | 0.816 ± 0.238 (0.0006)         |
| Cohort=1950                 | -0.241 ± 0.065 (0.0002)    | 0.966 ± 0.228 (<.0001)        | 1.252 ± 0.235 (<.0001)         |
| Cohort=1955                 | -0.244 ± 0.063 (0.0001)    | -0.502 ± 0.228 (0.0279)       | -0.195 ± 0.236 (0.4081)        |
| Cohort=1960                 | -0.303 ± 0.061 (<.0001)    | -4.239 ± 0.23 (<.0001)        | -3.842 ± 0.238 (<.0001)        |
| Cohort=1965                 | -0.266 ± 0.067 (<.0001)    | -7.899 ± 0.331 (<.0001)       | -7.506 ± 0.343 (<.0001)        |
| ZHeight                     | 0.169 ± 0.01 (<.0001)      | 0.148 ± 0.043 (0.0007)        | 0.004 ± 0.045 (0.9252)         |
| Zheight <sup>2</sup>        |                            |                               | -0.008 ± 0.029 (0.7716)        |
| N                           | 23758                      | 13931                         | 13814                          |
| Interaction                 | 2.223 (0.038)              | 166.31 (1.062)                | 1.069 (0.379)                  |
| Optimum (CI <sub>95</sub> ) |                            |                               |                                |
| Effect size                 | 5.3% (12.87-13.55)         | 1.2% (49.36-49.95)            | 0.1% (36.42-36.47)             |

<sup>a</sup> Restricted sample to those who had onset of menses between the ages of 8 and 20

<sup>b</sup> Restricted sample to those who had age of menopause between the ages of 30 and 60

<sup>c</sup> Age at menopause minus age at menses

Table S13. Poisson regression parameter estimates (B ± SE (p)) for the effect of birth cohort, age at menses, and female height on the number of children born and potential mediation effects of age at menses

|                             | Children ever born <sup>a</sup> | Children ever born <sup>a</sup> |
|-----------------------------|---------------------------------|---------------------------------|
| Cohort=1935 (Intercept)     | 1.079 ± 0.024 (<.0001)          | 0.166 ± 0.255 (0.5145)          |
| Cohort=1940                 | -0.128 ± 0.029 (<.0001)         | -0.128 ± 0.029 (<.0001)         |
| Cohort=1945                 | -0.195 ± 0.026 (<.0001)         | -0.194 ± 0.026 (<.0001)         |
| Cohort=1950                 | -0.22 ± 0.026 (<.0001)          | -0.217 ± 0.026 (<.0001)         |
| Cohort=1955                 | -0.269 ± 0.025 (<.0001)         | -0.265 ± 0.025 (<.0001)         |
| Cohort=1960                 | -0.353 ± 0.024 (<.0001)         | -0.349 ± 0.025 (<.0001)         |
| Cohort=1965                 | -0.393 ± 0.028 (<.0001)         | -0.389 ± 0.028 (<.0001)         |
| ZHeight                     | -0.005 ± 0.004 (0.2719)         | -0.008 ± 0.004 (0.0815)         |
| ZHeight <sup>2</sup>        | -0.006 ± 0.003 (0.0505)         | -0.005 ± 0.003 (0.053)          |
| Age menses                  |                                 | 0.123 ± 0.038 (0.0012)          |
| Age menses <sup>2</sup>     |                                 | -0.004 ± 0.001 (0.0041)         |
| N                           | 23758                           | 23758                           |
| Interaction                 | 1.645 (0.949)                   | 1.661 (0.948)                   |
| Optimum (CI <sub>95</sub> ) | -0.434 (-3.281, 0.781)          | -0.700 (-4.161, 1.040)          |
| Effect size                 | 3.3% (2.29-2.36)                | 4.1% (2.17-2.26) <sup>b</sup>   |

<sup>a</sup> We restricted the sample to those with no missing values for age at menses, and for whom the onset of menses occurred between the ages of 8 and 20

<sup>b</sup> This 'effect size' was established for the median age at menses (13).

Table S14. Poisson regression parameter estimates (B ± SE (p)) for the effect of birth cohort, height, health, education, and income on the number of ever born children and the number of surviving children

|                                                                          | <b>Female</b><br>Children ever<br>born | Children surviving<br>to age 18 | <b>Male</b><br>Children ever<br>born | Children surviving<br>to age 18 |
|--------------------------------------------------------------------------|----------------------------------------|---------------------------------|--------------------------------------|---------------------------------|
| Cohort=1935 (Intercept)                                                  | 1.204 ± 0.082<br>( $<.0001$ )          | 1.19 ± 0.082<br>( $<.0001$ )    | 0.665 ± 0.131<br>( $<.0001$ )        | 0.652 ± 0.131<br>( $<.0001$ )   |
| Cohort=1940                                                              | -0.135 ± 0.035<br>( $<.0001$ )         | -0.137 ± 0.035<br>( $<.0001$ )  | -0.112 ± 0.035<br>(0.0015)           | -0.108 ± 0.036<br>(0.0024)      |
| Cohort=1945                                                              | -0.217 ± 0.032<br>( $<.0001$ )         | -0.221 ± 0.032<br>( $<.0001$ )  | -0.165 ± 0.033<br>( $<.0001$ )       | -0.16 ± 0.033<br>( $<.0001$ )   |
| Cohort=1950                                                              | -0.237 ± 0.032<br>( $<.0001$ )         | -0.234 ± 0.032<br>( $<.0001$ )  | -0.188 ± 0.033<br>( $<.0001$ )       | -0.18 ± 0.033<br>( $<.0001$ )   |
| Cohort=1955                                                              | -0.284 ± 0.031<br>( $<.0001$ )         | -0.283 ± 0.031<br>( $<.0001$ )  | -0.26 ± 0.032<br>( $<.0001$ )        | -0.253 ± 0.032<br>( $<.0001$ )  |
| Cohort=1960                                                              | -0.368 ± 0.03<br>( $<.0001$ )          | -0.365 ± 0.031<br>( $<.0001$ )  | -0.385 ± 0.031<br>( $<.0001$ )       | -0.379 ± 0.031<br>( $<.0001$ )  |
| Cohort=1965                                                              | -0.409 ± 0.034<br>( $<.0001$ )         | -0.406 ± 0.034<br>( $<.0001$ )  | -0.421 ± 0.035<br>( $<.0001$ )       | -0.417 ± 0.035<br>( $<.0001$ )  |
| Zheight                                                                  | -0.002 ± 0.005<br>(0.6587)             | -0.001 ± 0.005<br>(0.8225)      | 0.013 ± 0.006<br>(0.0264)            | 0.014 ± 0.006<br>(0.0183)       |
| Zheight <sup>2</sup>                                                     | -0.008 ± 0.003<br>(0.0173)             | -0.009 ± 0.003<br>(0.0117)      | -0.01 ± 0.004<br>(0.0078)            | -0.011 ± 0.004<br>(0.005)       |
| Health <sup>a</sup>                                                      |                                        |                                 |                                      |                                 |
| Excellent                                                                | 0.003 ± 0.021<br>(0.8829)              | 0.004 ± 0.021<br>(0.84)         | -0.019 ± 0.021<br>(0.3786)           | -0.017 ± 0.021<br>(0.4103)      |
| Very good                                                                | -0.042 ± 0.02<br>(0.0307)              | -0.044 ± 0.02<br>(0.0269)       | -0.052 ± 0.02<br>(0.0086)            | -0.053 ± 0.02<br>(0.0083)       |
| Good                                                                     | -0.083 ± 0.024<br>(0.0008)             | -0.086 ± 0.025<br>(0.0005)      | -0.091 ± 0.027<br>(0.0008)           | -0.092 ± 0.027<br>(0.0007)      |
| Not so good                                                              | -0.246 ± 0.089<br>(0.0059)             | -0.248 ± 0.09<br>(0.0058)       | -0.119 ± 0.087<br>(0.1692)           | -0.121 ± 0.087<br>(0.1655)      |
| Education <sup>b</sup>                                                   |                                        |                                 |                                      |                                 |
| Primary education                                                        | 0.035 ± 0.073<br>(0.6316)              | 0.038 ± 0.074<br>(0.6104)       | 0.064 ± 0.087<br>(0.4601)            | 0.059 ± 0.087<br>(0.4964)       |
| Lower or preparatory vocational education                                | 0.003 ± 0.068<br>(0.968)               | 0.005 ± 0.068<br>(0.9371)       | 0.072 ± 0.079<br>(0.3639)            | 0.072 ± 0.08<br>(0.3691)        |
| Lower general secondary education                                        | -0.019 ± 0.068<br>(0.7746)             | -0.018 ± 0.068<br>(0.7919)      | 0.042 ± 0.08<br>(0.5995)             | 0.04 ± 0.08<br>(0.6214)         |
| Intermediate vocational education or apprenticeship                      | 0.005 ± 0.068<br>(0.9418)              | 0.007 ± 0.068<br>(0.9144)       | 0.073 ± 0.079<br>(0.3553)            | 0.073 ± 0.08<br>(0.3606)        |
| Higher general secondary education or pre-university secondary education | -0.062 ± 0.069<br>(0.3671)             | -0.061 ± 0.07<br>(0.3852)       | 0.03 ± 0.082<br>(0.7175)             | 0.023 ± 0.082<br>(0.7804)       |
| Higher vocational education                                              | -0.099 ± 0.068<br>(0.1461)             | -0.099 ± 0.069<br>(0.1507)      | 0.058 ± 0.08<br>(0.4646)             | 0.059 ± 0.08<br>(0.4596)        |
| University                                                               | -0.211 ± 0.075<br>(0.0048)             | -0.205 ± 0.075<br>(0.0064)      | 0.091 ± 0.082<br>(0.2674)            | 0.091 ± 0.082<br>(0.2679)       |
| Income <sup>c</sup>                                                      |                                        |                                 |                                      |                                 |
| €750 - €1000                                                             | -0.091 ± 0.041<br>(0.0286)             | -0.092 ± 0.042<br>(0.027)       | -0.11 ± 0.119<br>(0.3553)            | -0.104 ± 0.119<br>(0.3841)      |
| €1000 - €1500                                                            | -0.087 ± 0.036<br>(0.0167)             | -0.089 ± 0.037<br>(0.0155)      | 0.234 ± 0.101<br>(0.0204)            | 0.23 ± 0.102<br>(0.0238)        |
| €1500 - €2000                                                            | -0.086 ± 0.036<br>(0.0159)             | -0.088 ± 0.036<br>(0.0138)      | 0.331 ± 0.099<br>(0.0008)            | 0.328 ± 0.1<br>(0.001)          |
| €2000 - €2500                                                            | -0.049 ± 0.036                         | -0.052 ± 0.036                  | 0.389 ± 0.099                        | 0.385 ± 0.099                   |

|                             |                            |                            |                           |                           |
|-----------------------------|----------------------------|----------------------------|---------------------------|---------------------------|
|                             | (0.1681)                   | (0.1477)                   | (<.0001)                  | (0.0001)                  |
| €2500 - €3000               | -0.021 ± 0.036<br>(0.5471) | -0.024 ± 0.036<br>(0.4966) | 0.413 ± 0.099<br>(<.0001) | 0.411 ± 0.099<br>(<.0001) |
| €3000 - €3500               | -0.033 ± 0.036<br>(0.3615) | -0.034 ± 0.037<br>(0.3548) | 0.39 ± 0.099<br>(<.0001)  | 0.384 ± 0.1<br>(0.0001)   |
| > €3500                     | -0.045 ± 0.036<br>(0.2177) | -0.047 ± 0.036<br>(0.1996) | 0.385 ± 0.099<br>(0.0001) | 0.383 ± 0.099<br>(0.0001) |
| N                           | 18274                      | 18274                      | 14672                     | 14672                     |
| Interaction                 | 3.2 (0.783)                | 2.814 (0.832)              | 7.427 (0.283)             | 7.751 (0.257)             |
| Optimum (CI <sub>95</sub> ) | -0.139<br>(-0.990, 0.585)  | -0.066<br>(-1.079, 0.674)  | 0.63<br>(0.060, 2.224)    | 0.63<br>(0.115, 2.060)    |
| Effect size <sup>d</sup>    | 3.8% (2.27-2.35)           | 3.8% (2.24-2.32)           | 7.3% (2.20-2.36)          | 7.8% (2.17-2.34)          |

<sup>a</sup> Reference category “Poor”

<sup>b</sup> Reference category “No education”

<sup>c</sup> Reference category “< €750 Euro”

<sup>d</sup> This ‘effect size’ was established for “Good” health, “Secondary education”, and €2000 - €2500 income.
